# Supplementary material for: Efficient red phosphorescent Ir(iii) complexes based on rigid ligands with high external quantum efficiency and low efficiency roll-off
Source: Royal Society of Chemistry journal article supplement (doi:10.1039/c9tc06940b), 2020-01-01
Supplement: c9tc06940b1.pdf [file c9tc06940b1.pdf]

Efficient red phosphorescent Ir(III) complexes based on rigid ligands with high external quantum efficiency and low efficiency roll-off

Sheng-Nan Liu,<sup>†a</sup> Kaining Tong,<sup>†a</sup> Yue Zhao,<sup>b</sup> Jin-Feng Cheng,<sup>a</sup> Man-Keung Fung<sup>\*ac</sup> and Jian Fan,<sup>\*ac</sup>

<sup>a</sup> *Institute of Functional Nano & Soft Materials (FUNSOM), Jiangsu Key Laboratory for Carbon-Based Functional Materials & Devices, Soochow University, Suzhou, Jiangsu 215123, China*

<sup>b</sup> *Coordination Chemistry Institute, State Key Laboratory of Coordination Chemistry, School of Chemistry and Chemical Engineering, Nanjing National Laboratory of Microstructures, Nanjing University, Nanjing 210023, China*

<sup>c</sup> *Institute of Organic Optoelectronics (IOO) of the Jiangsu Industrial Technology Research Institute (JITRI), Suzhou, Jiangsu 215212, China*

E-mail: mkfung@suda.edu.cn; jianfan@suda.edu.cn

<sup>†</sup>These two authors contribute equally to this work.

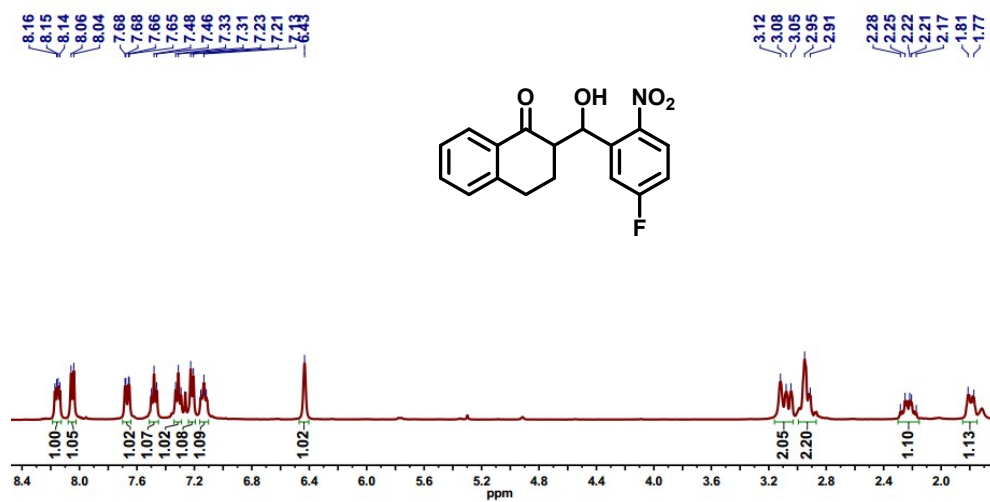

Figure S1. <sup>1</sup>H MMR of compound 2.

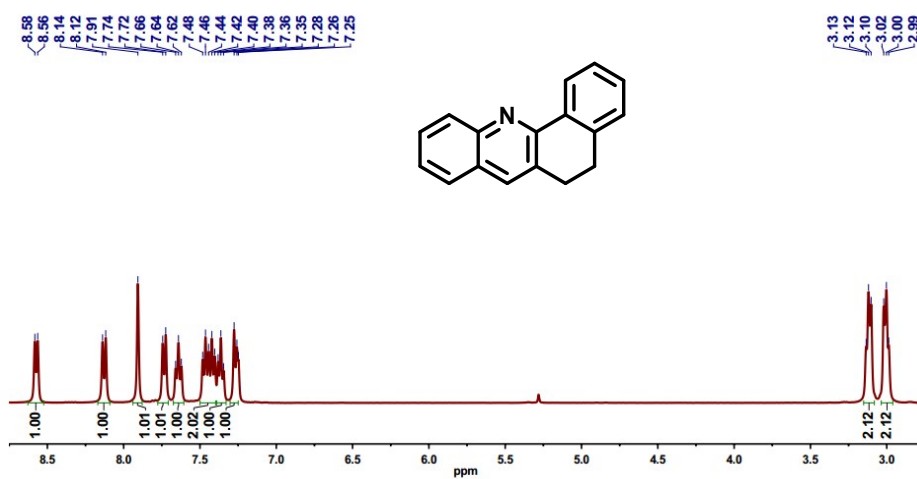

Figure S2. <sup>1</sup>H MMR of compound 3.

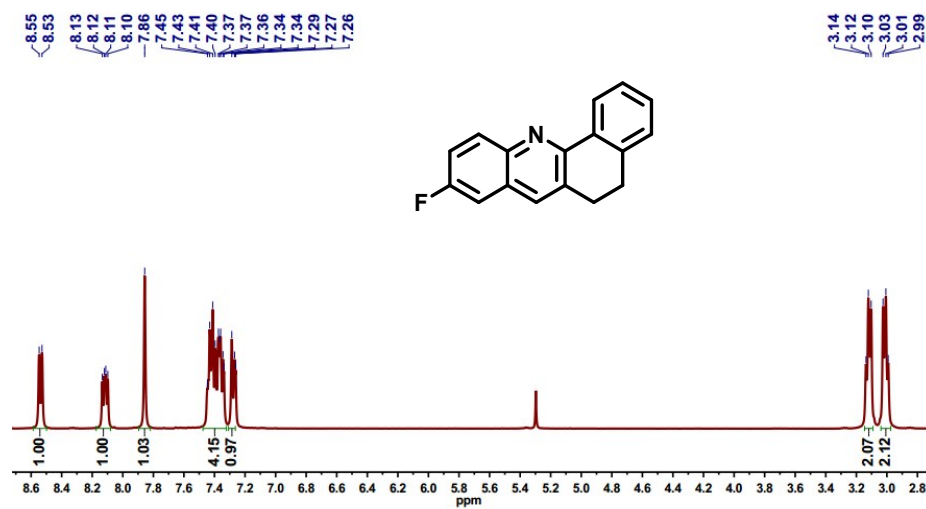

Figure S3. <sup>1</sup>H MMR of compound 4.

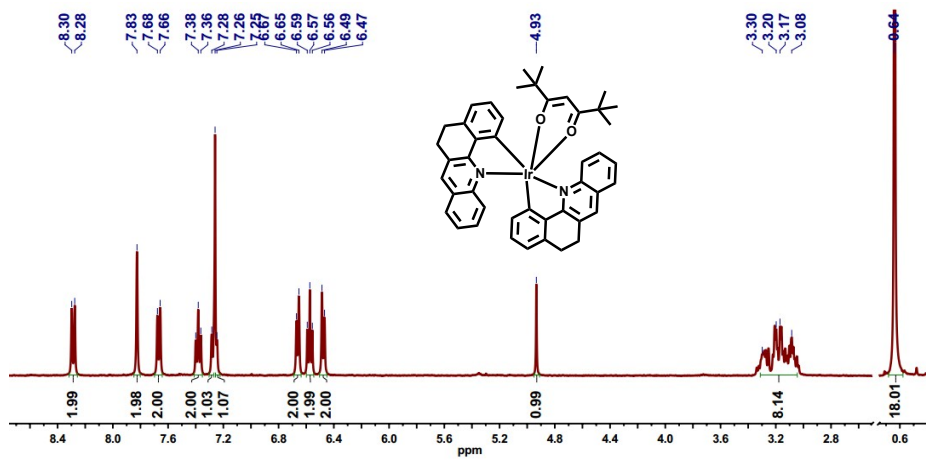

Figure S4. <sup>1</sup>H MMR of Ir-DHBA.

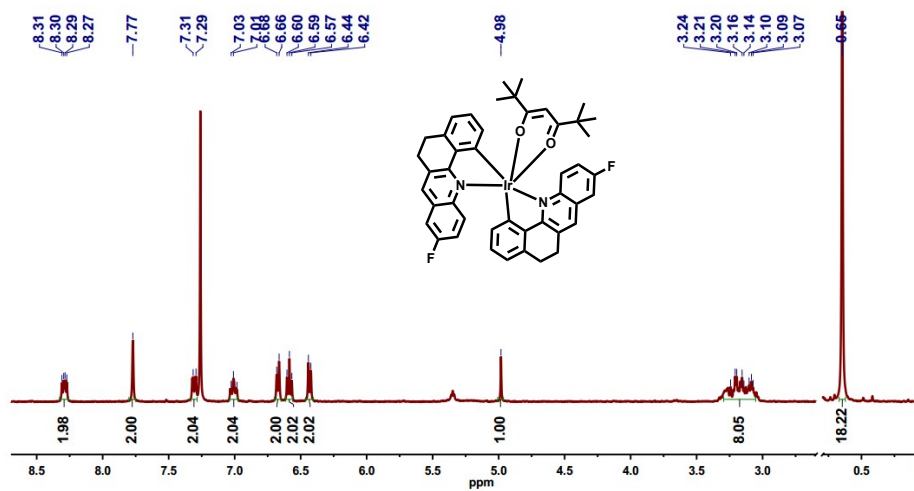

Figure S5.  $^1\text{H}$  MMR of Ir-F-DHBA.

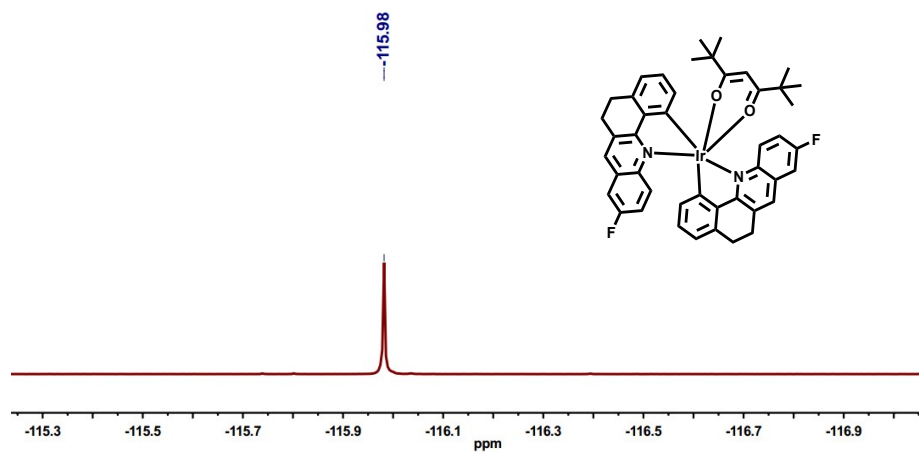

Figure S6.  $^{19}\text{F}$  MMR of Ir-F-DHBA.

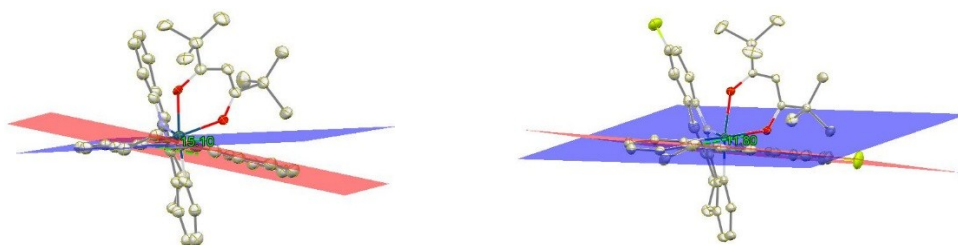

Figure S7. The slightly puckered arrangement of ligands in Ir(III) complexes.
